# Supplementary material for: Homochiral porous solids based on 1D coordination polymers built from 46-membered macrocycles
Source: Royal Society of Chemistry journal article supplement (doi:10.1039/b606817k), 2006-01-01
Supplement: b606817k.pdf [file b606817k.pdf]

## Supplemental Information

### Homochiral Porous Solids Based on 1D Coordination Polymers Built from 46-Membered Macrocycles

Chuan-De Wu<sup>1,2</sup> and Wenbin Lin<sup>\*,1</sup>

<sup>1</sup>Department of Chemistry, CB#3290, University of North Carolina, Chapel Hill, NC  
27599, USA

<sup>2</sup>Department of Chemistry, Zhejiang University, Hangzhou 310027, China  
Email: wlin@unc.edu

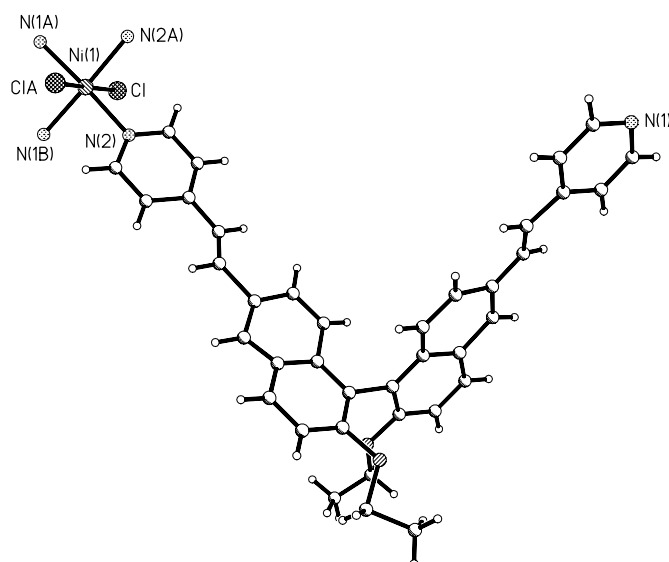

**Figure S1.** Symmetry expanded local structure for **1**.

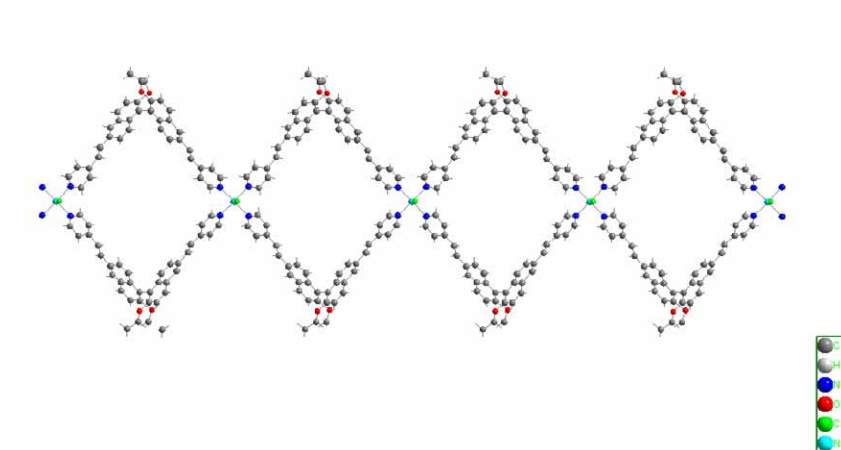

**Figure S2.** Ball-and-Stick representation of the 1D chain in **1**.

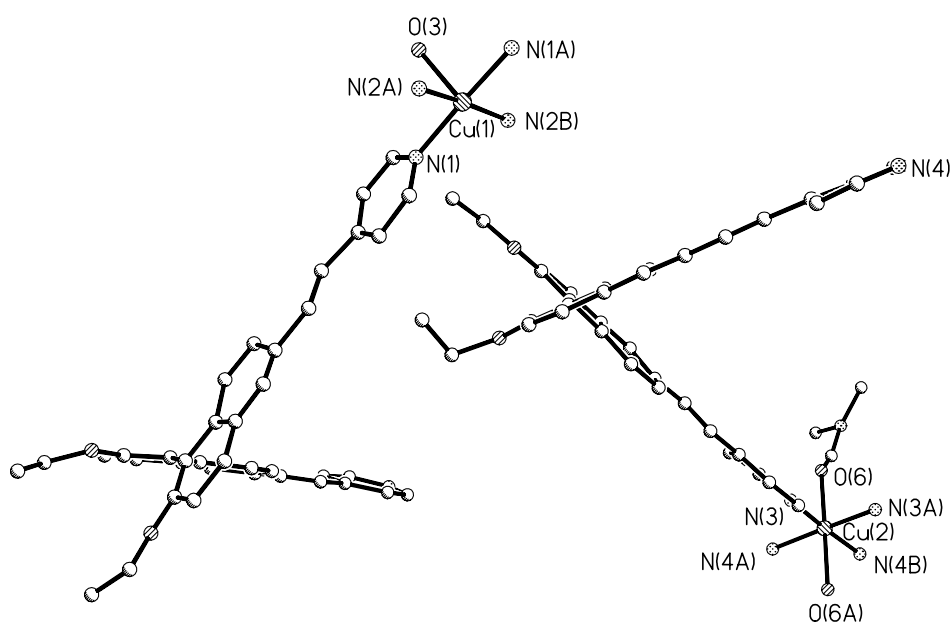

**Figure S3.** Symmetry expanded local structure for **2**.

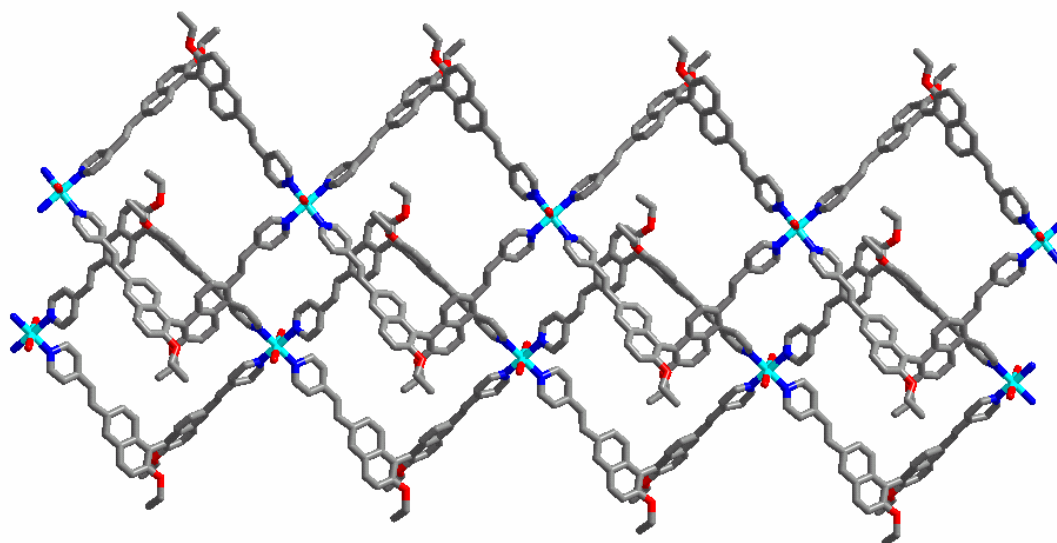

**Figure S4.** Wire-frame representation of two kinds of 1D chains in **2**.

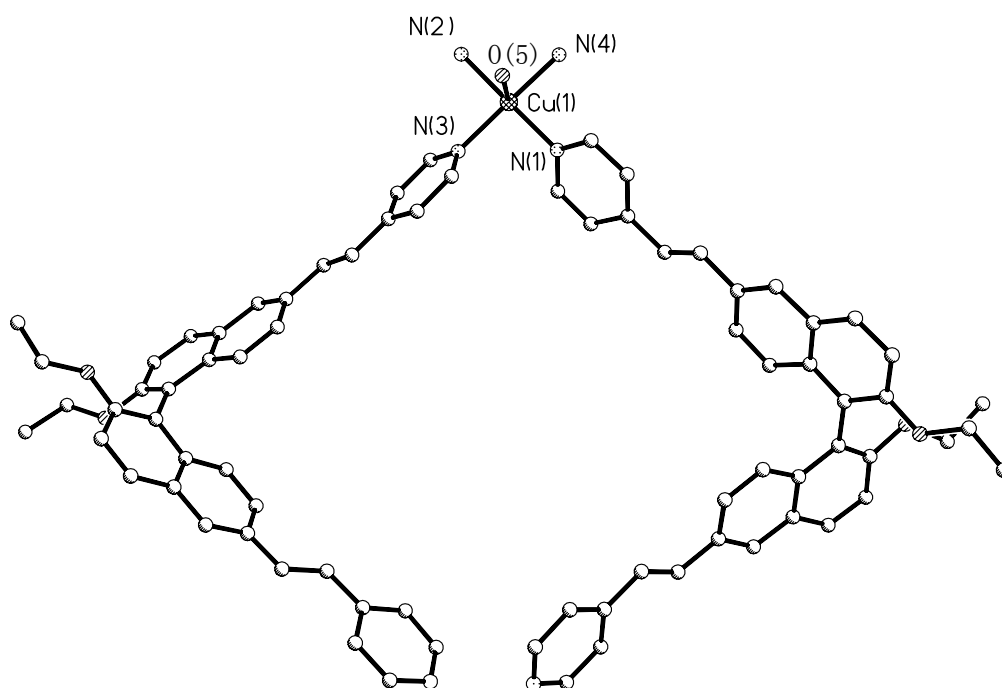

**Figure S5.** Symmetry expanded local structure for **3**.

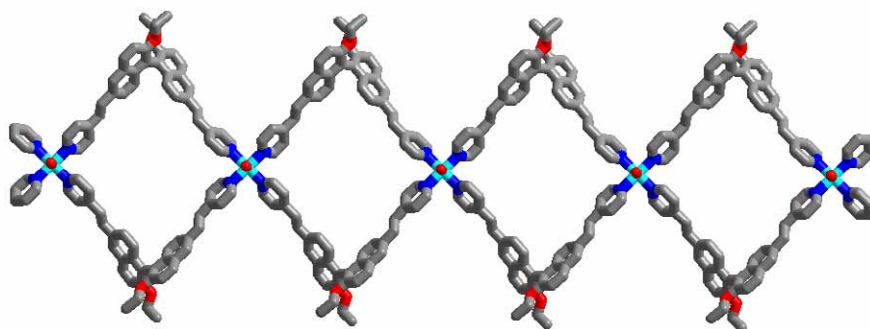

**Figure S6.** Wire-frame representation of the polymeric chain in **3**.

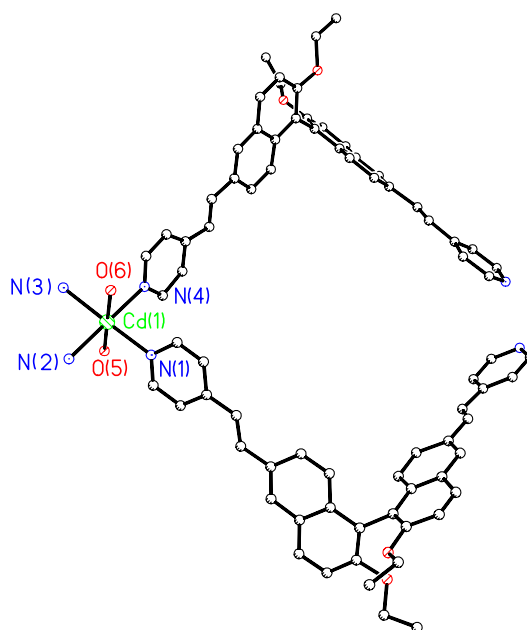

**Figure S7.** Symmetry expanded local structure for **4**.

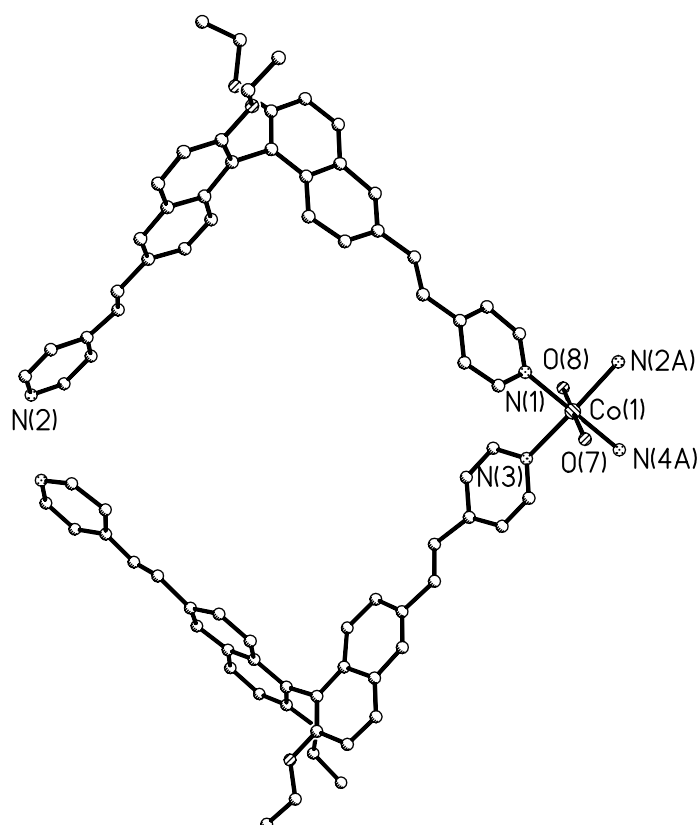

**Figure S8.** Symmetry expanded local structure for **5**.

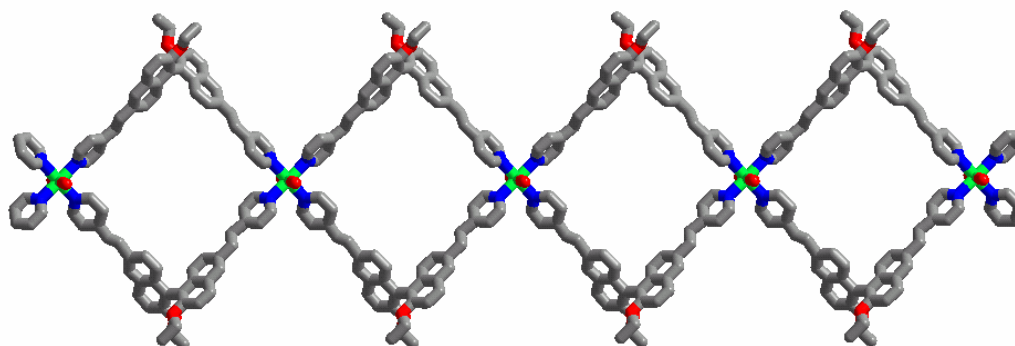

**Figure S9.** Wire-frame representation of the 1D polymeric chain in **5**.

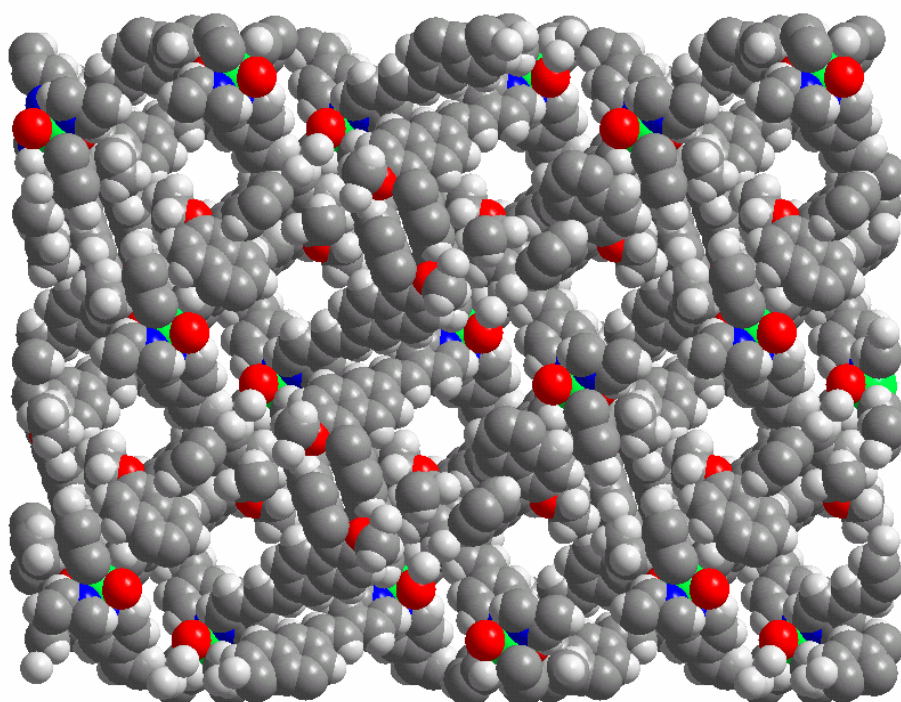

**Figure S10.** Space-filling model representation of the packing of **5** as viewed down the *b*-axis (Co, Cyan; O, Red; N, Blue; C, Dark grey and H, Light grey).

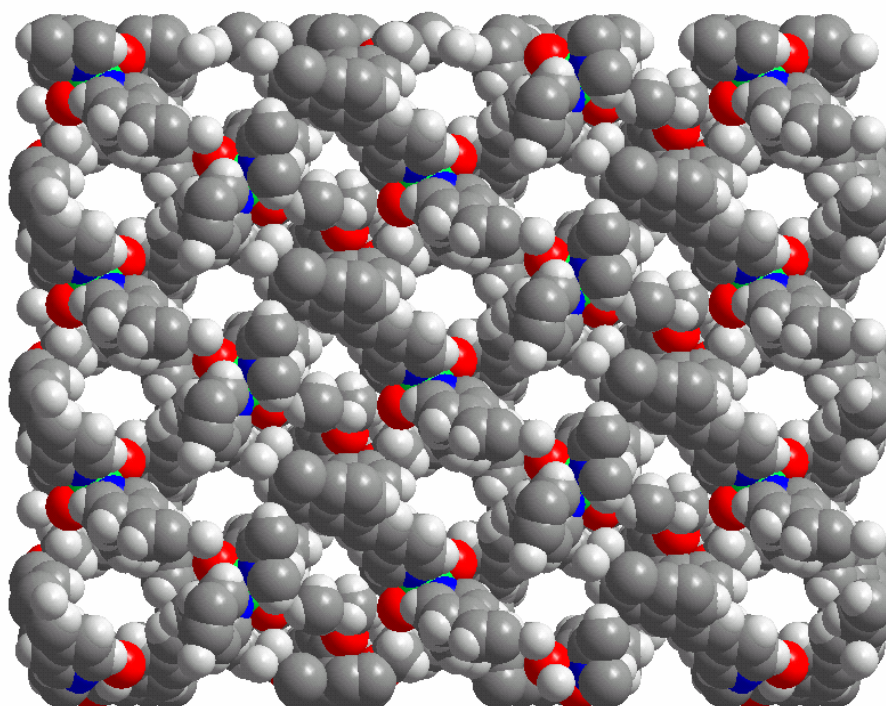

**Figure S11.** Space-filling model representation of the packing of **5** as viewed down the *c*-axis (Co, Cyan; O, Red; N, Blue; C, Dark grey and H, Light grey).

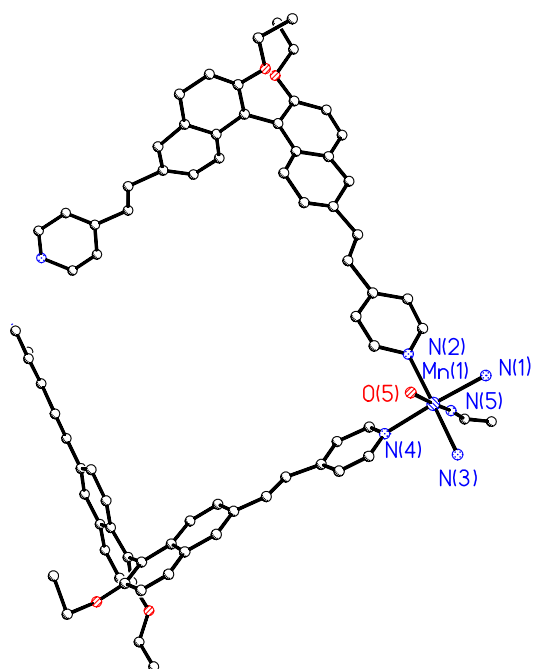

**Figure S12.** Symmetry expanded local structure for **6**.

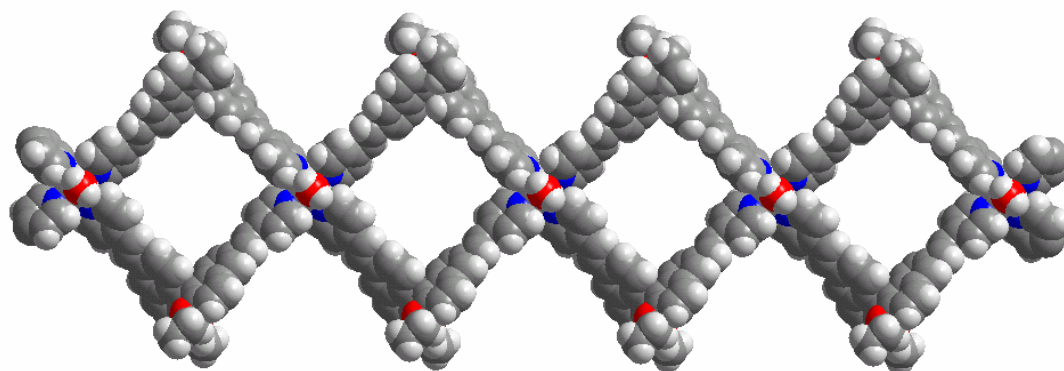

**Figure S13.** Space-filling representation of the 1D polymeric chain in **6**.

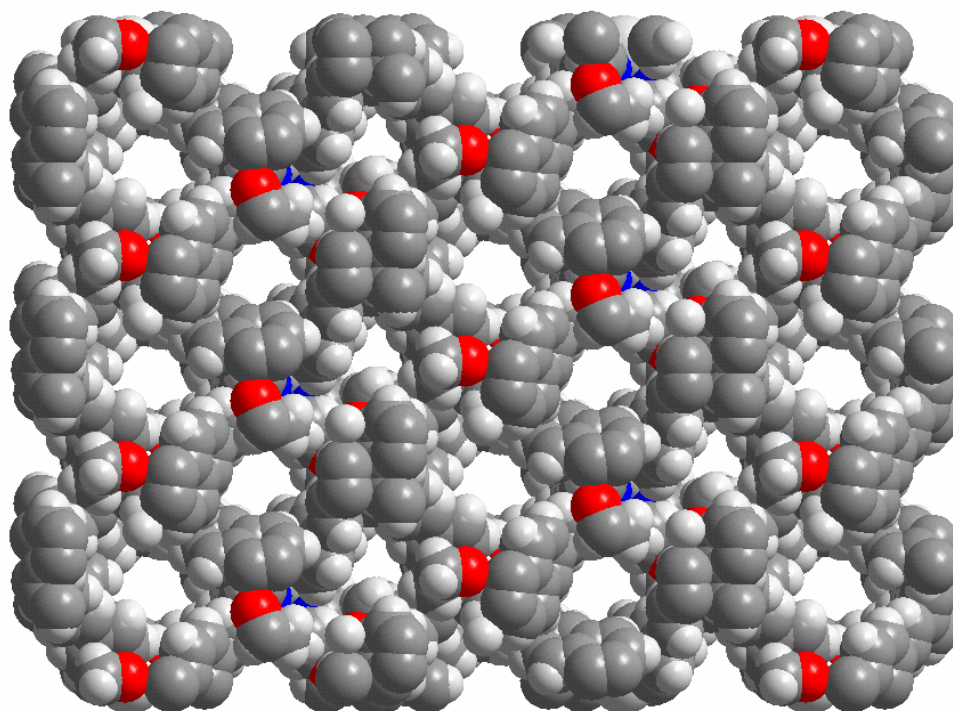

**Figure S14.** Space-filling model representation of the packing of **6** as viewed down the *c*-axis (Mn, Cyan; O, Red; N, Blue; C, Dark grey and H, Light grey).

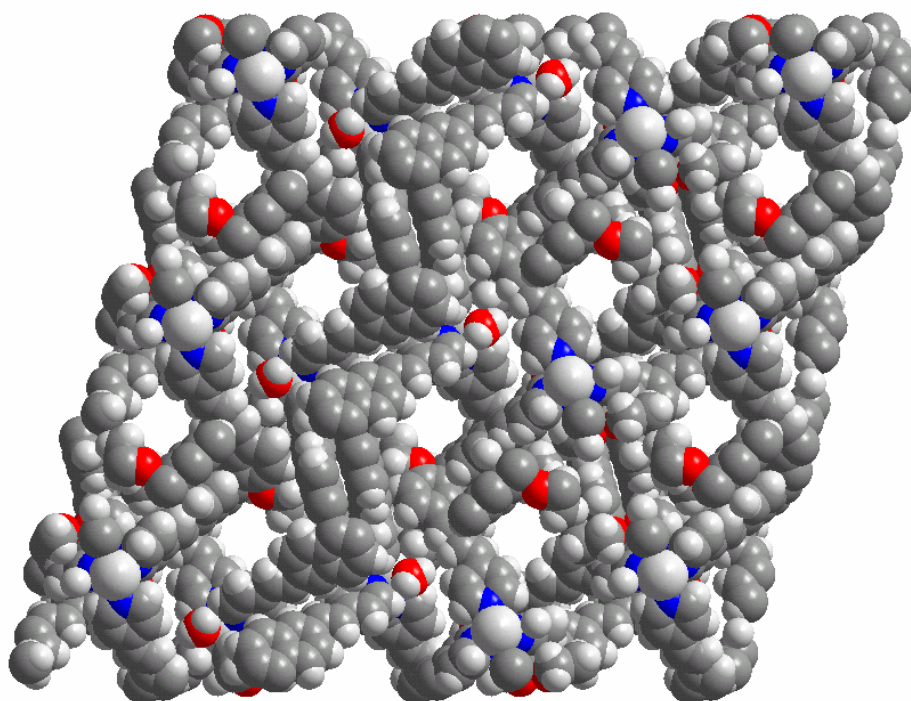

**Figure S15.** Space-filling model representation of the packing of **6** as viewed down the *b*-axis (Mn, Cyan; O, Red; N, Blue; C, Dark grey and H, Light grey).



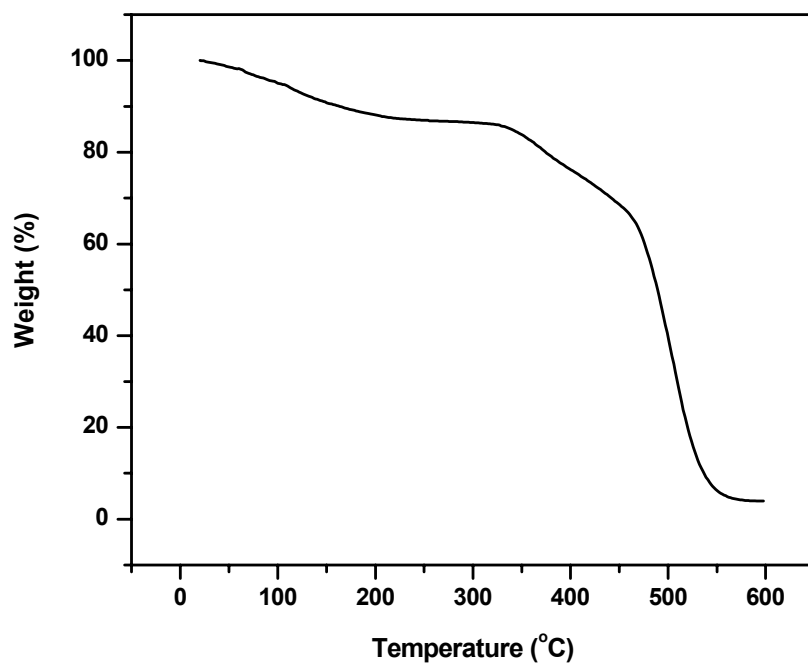

**Figure S16.** Thermogravimetric analyses (TGA) for **1** between 20 and 600 °C.

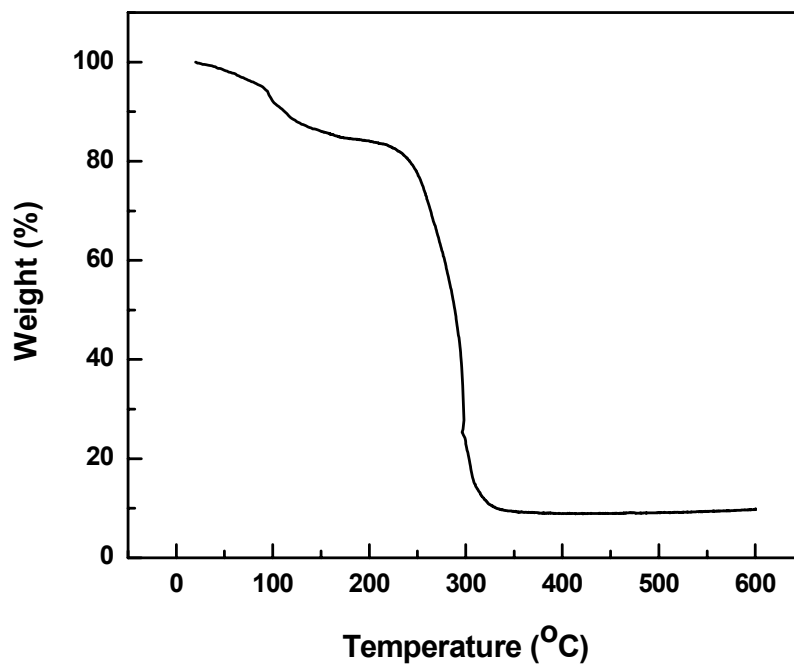

**Figure S17.** Thermogravimetric analyses (TGA) for **2** between 20 and 600 °C.

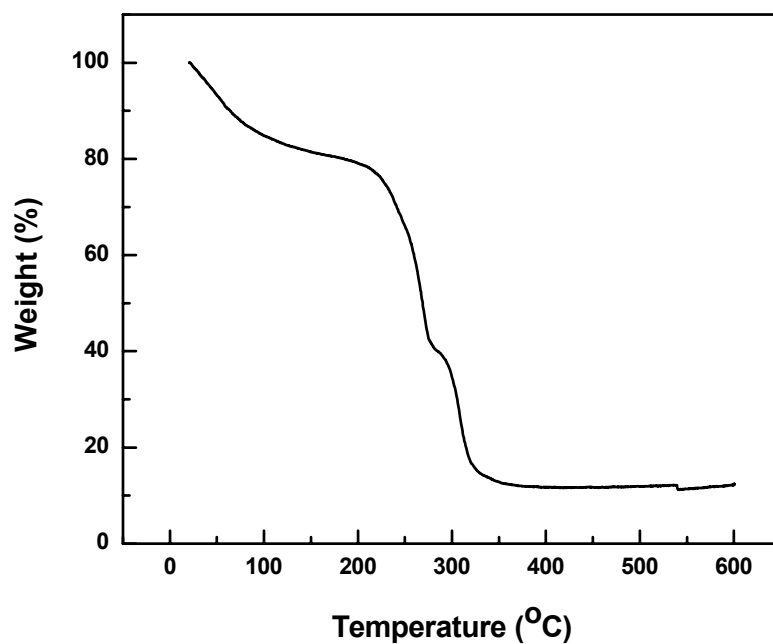

**Figure S18.** Thermogravimetric analyses (TGA) for **3** between 20 and 600°C.

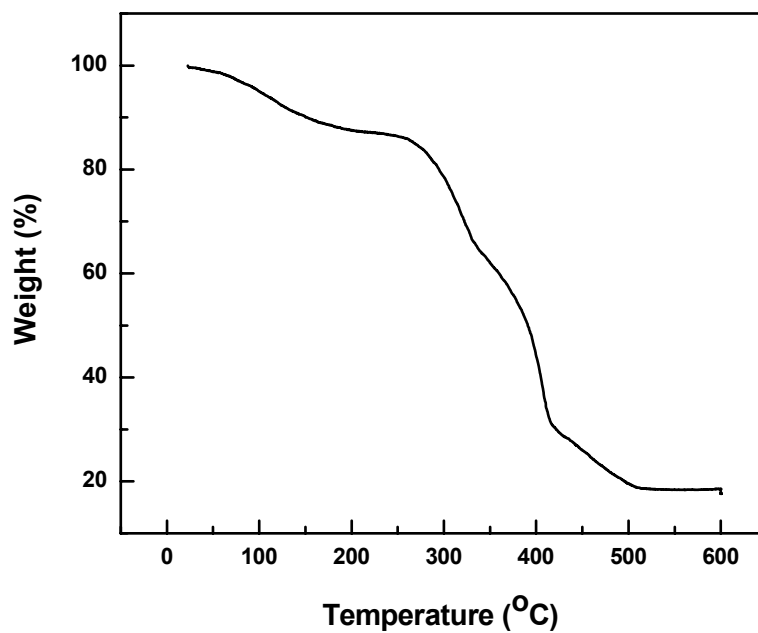

**Figure S19.** Thermogravimetric analyses (TGA) for **4** between 20 and 600 °C.

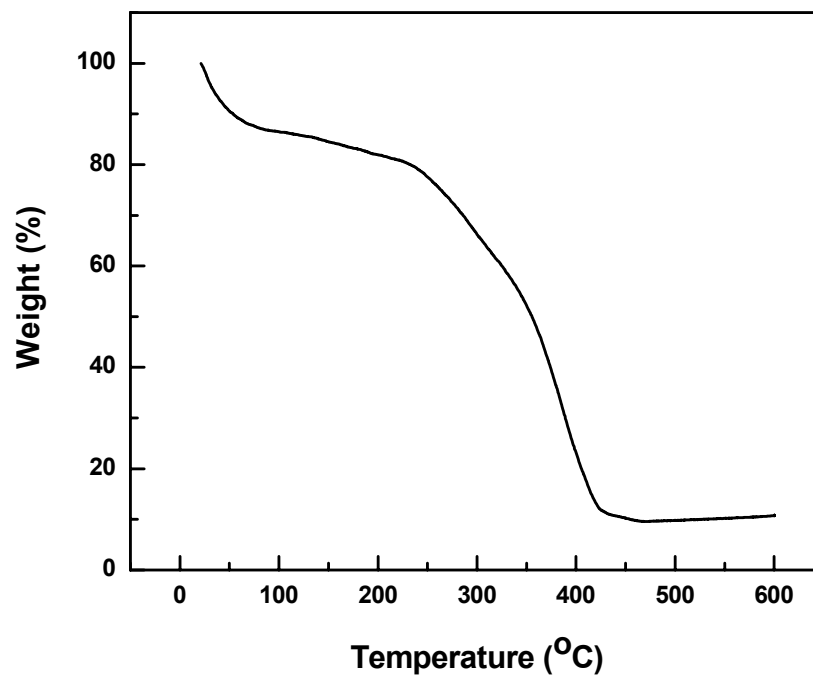

**Figure S20.** Thermogravimetric analyses (TGA) for **5** between 20 and 600 °C.

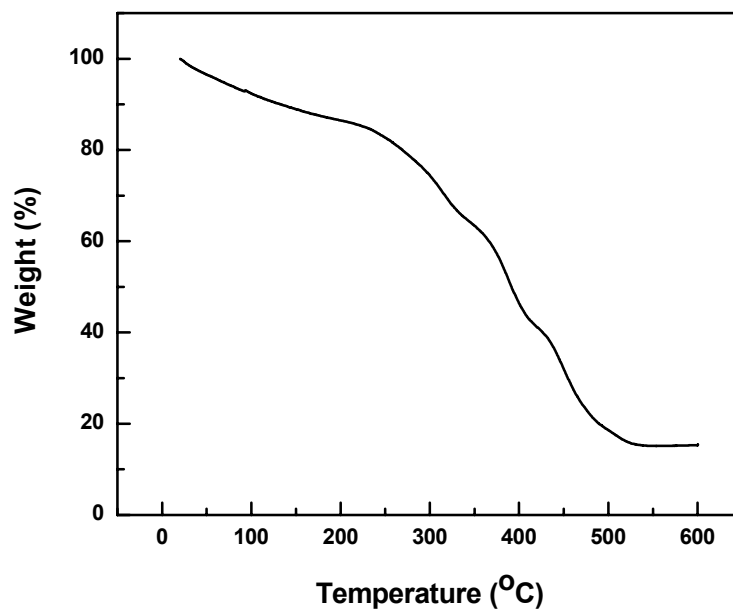

**Figure S21.** Thermogravimetric analyses (TGA) for **6** between 20 and 600 °C.

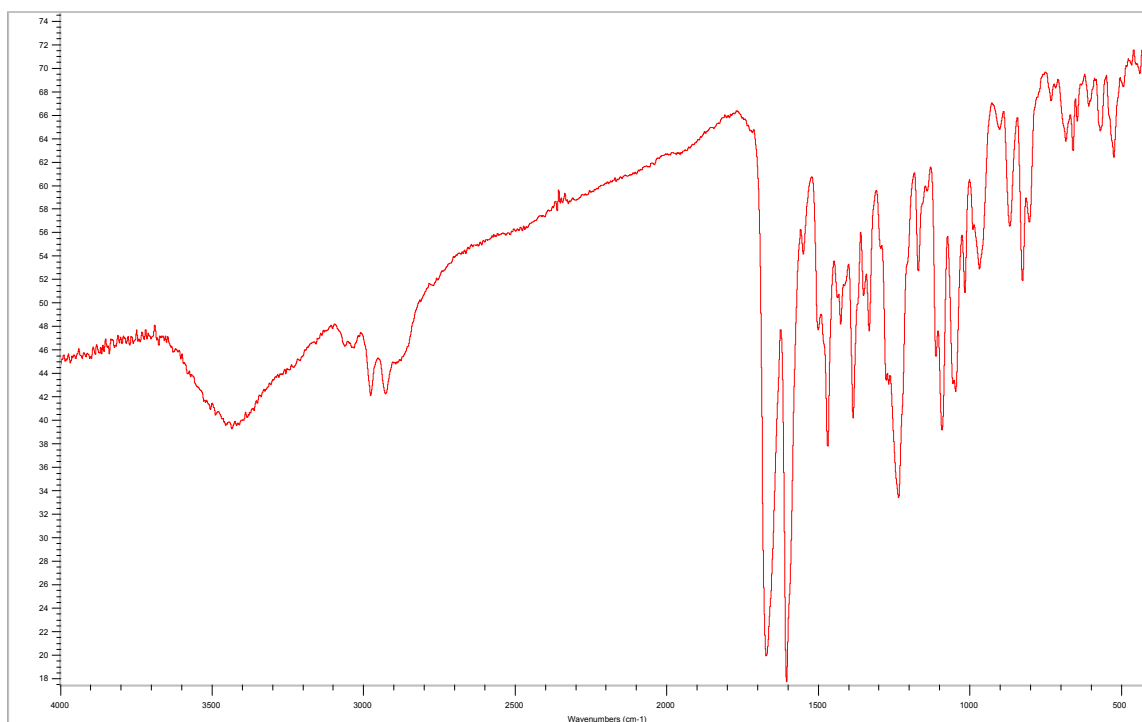

**Figure S22.** IR spectrum of **1**.

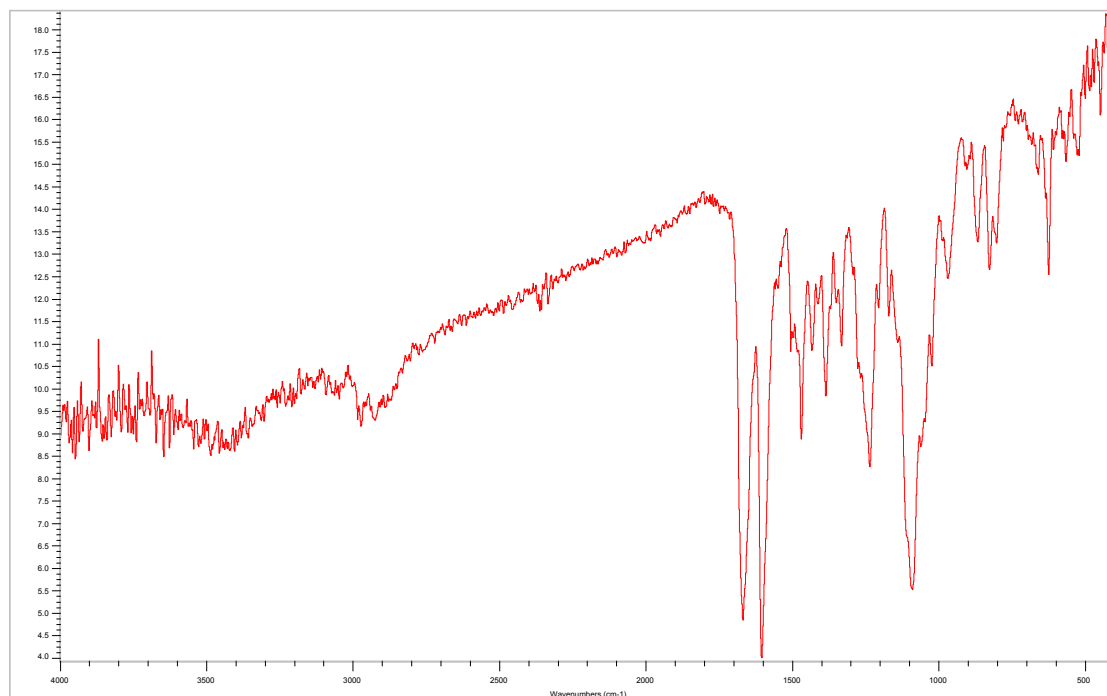

**Figure S23.** IR spectrum of **2**.

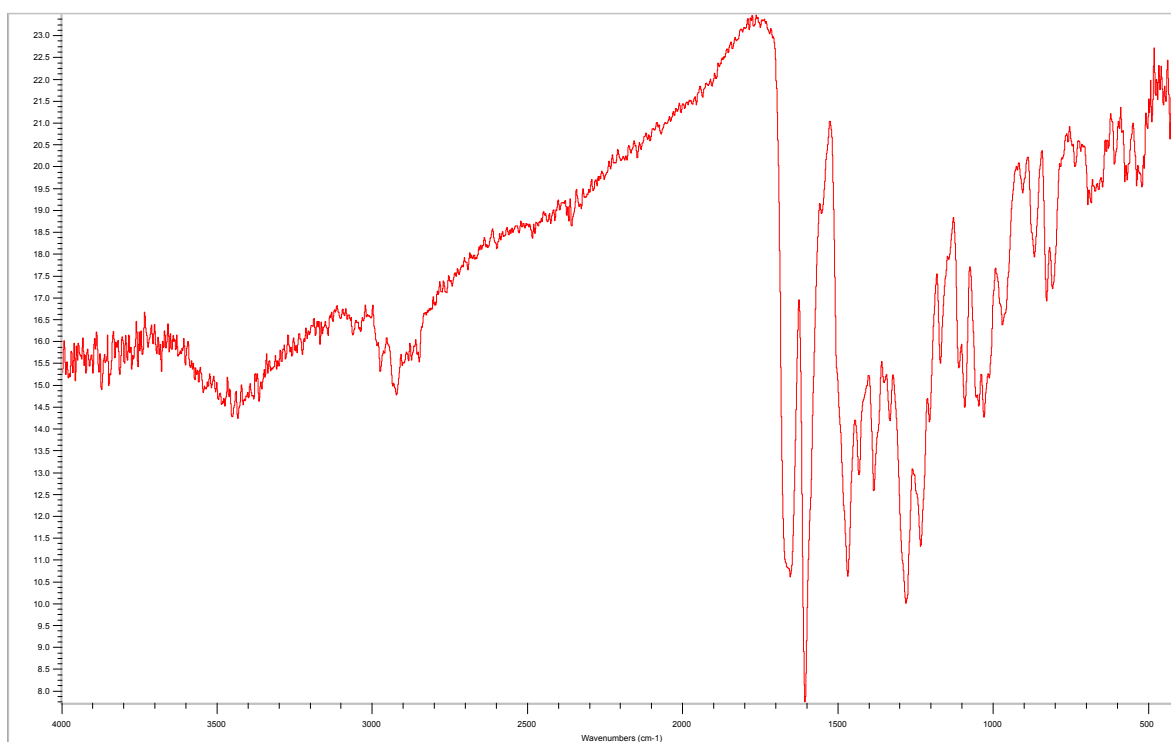

**Figure S24.** IR spectrum of **3**.

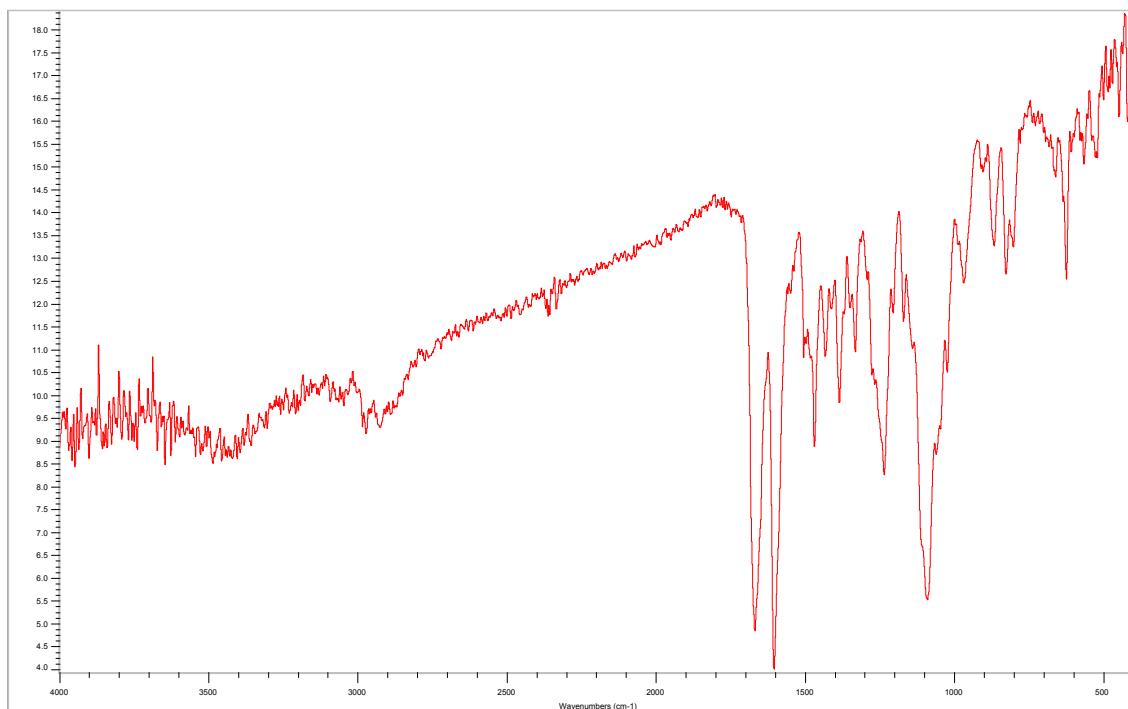

**Figure S25.** IR spectrum of **4**.

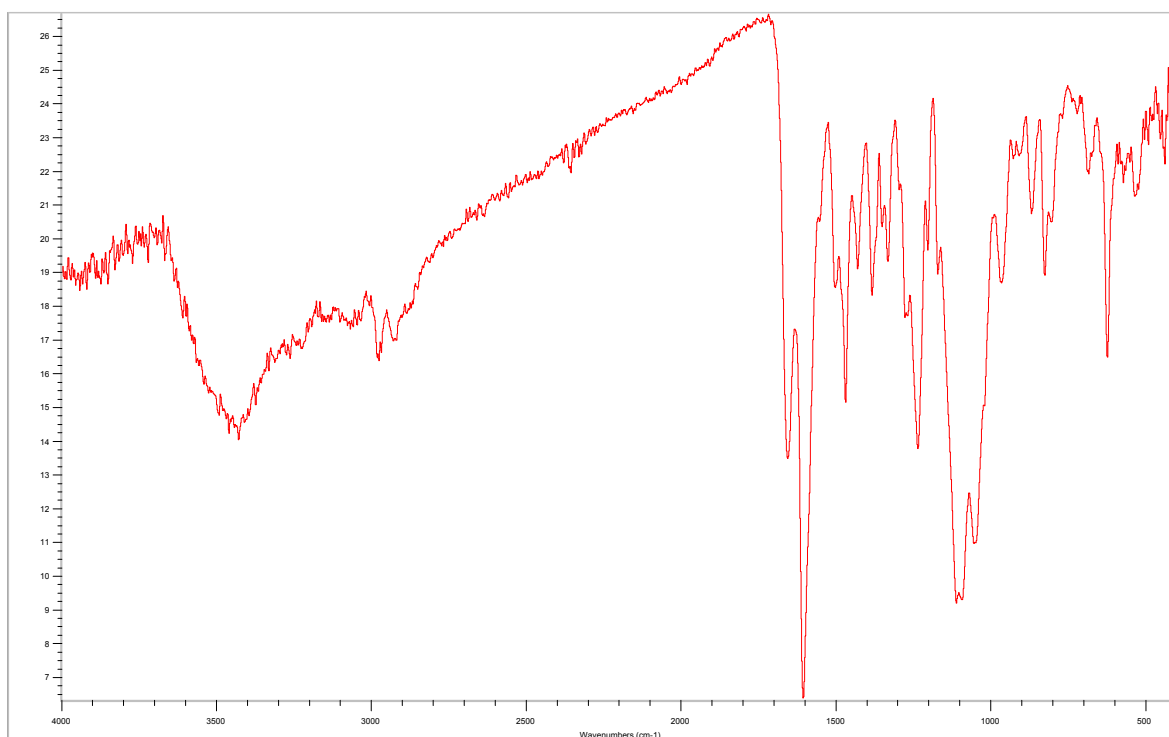

**Figure S26.** IR spectrum of **5**.

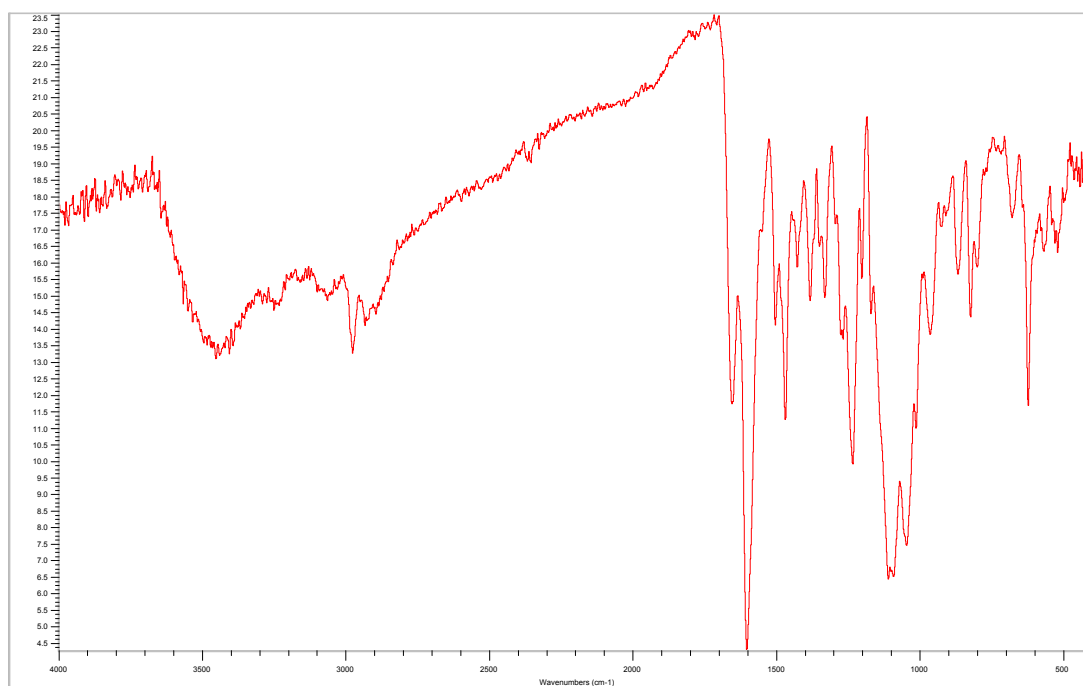

**Figure S27.** IR spectrum of **6**.
